# Supplementary material
Source: PubMed Central journal article supplement (PMC7042939)
Supplement: jamapsychiatry-77-574-s003.pdf [file jamapsychiatry-77-574-s003.pdf]

## **Data Sharing Statement**

Danielson. Safety and Efficacy of Exposure-Based Risk Reduction Through Family Therapy for Co-occurring Substance Use Problems and Posttraumatic Stress Disorder Symptoms Among Adolescents. *JAMA Psychiatry*. Published February 05, 2020. 10.1001/jamapsychiatry.2019.4803

### **Data**

**Data available:** No

### **Additional Information**

**Explanation for why data not available:** We are unable to share the data at this time, because we did not include data sharing in our IRB and informed consent process.
